# Supplementary material for: Inactivation of lmo0946 (sif) induces the SOS response and MGEs mobilization and silences the general stress response and virulence program in Listeria monocytogenes
Source: Frontiers journal article supplement (doi:10.3389/fmicb.2023.1324062), 2024-01-04
Supplement: Image_1.PDF [file Image_1.PDF]

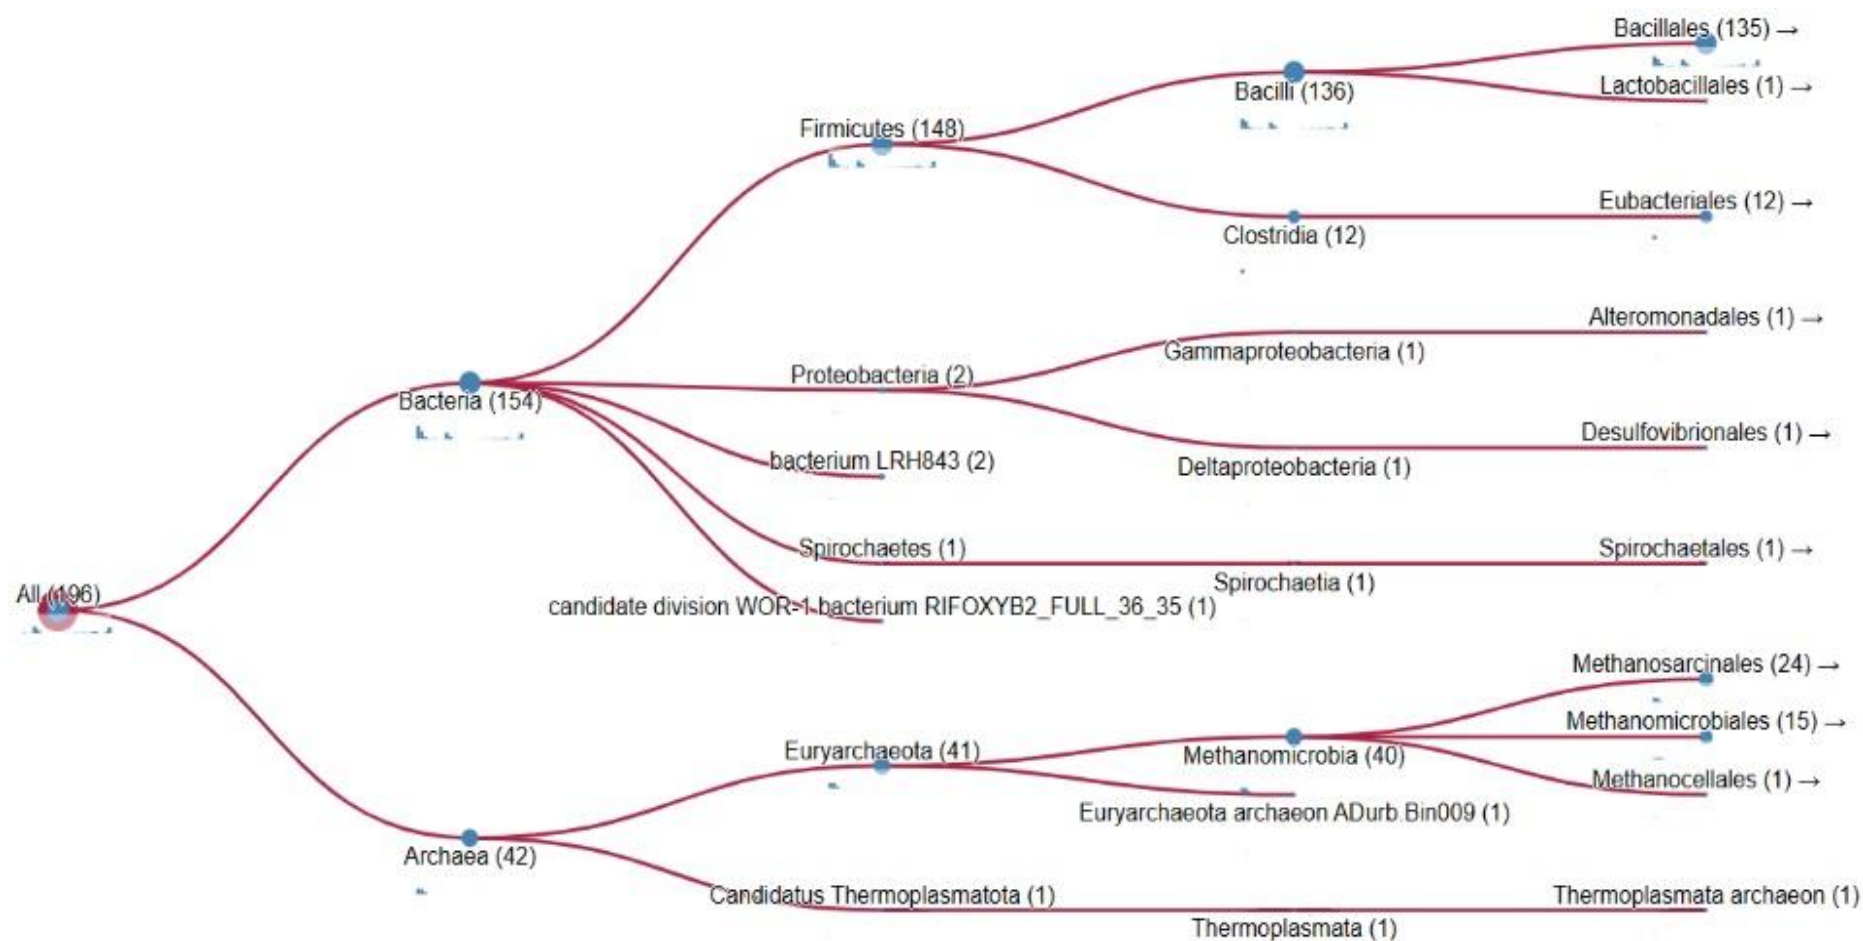

**Figure S1. PHAMMER analysis of taxonomic distribution of Lmo0946 homologs in UniProtKB database.**
